# Supplementary material for: Lactic Acidosis Together with GM-CSF and M-CSF Induces Human Macrophages toward an Inflammatory Protumor Phenotype
Source: Oxford University Press journal article supplement (doi:10.1158/2326-6066.cir-18-0749), 2020-01-10
Supplement: 23266066cir180749-sup-210616_3_supp_5960171_q2gpd5.docx [file 23266066cir180749-sup-210616_3_supp_5960171_q2gpd5.docx]

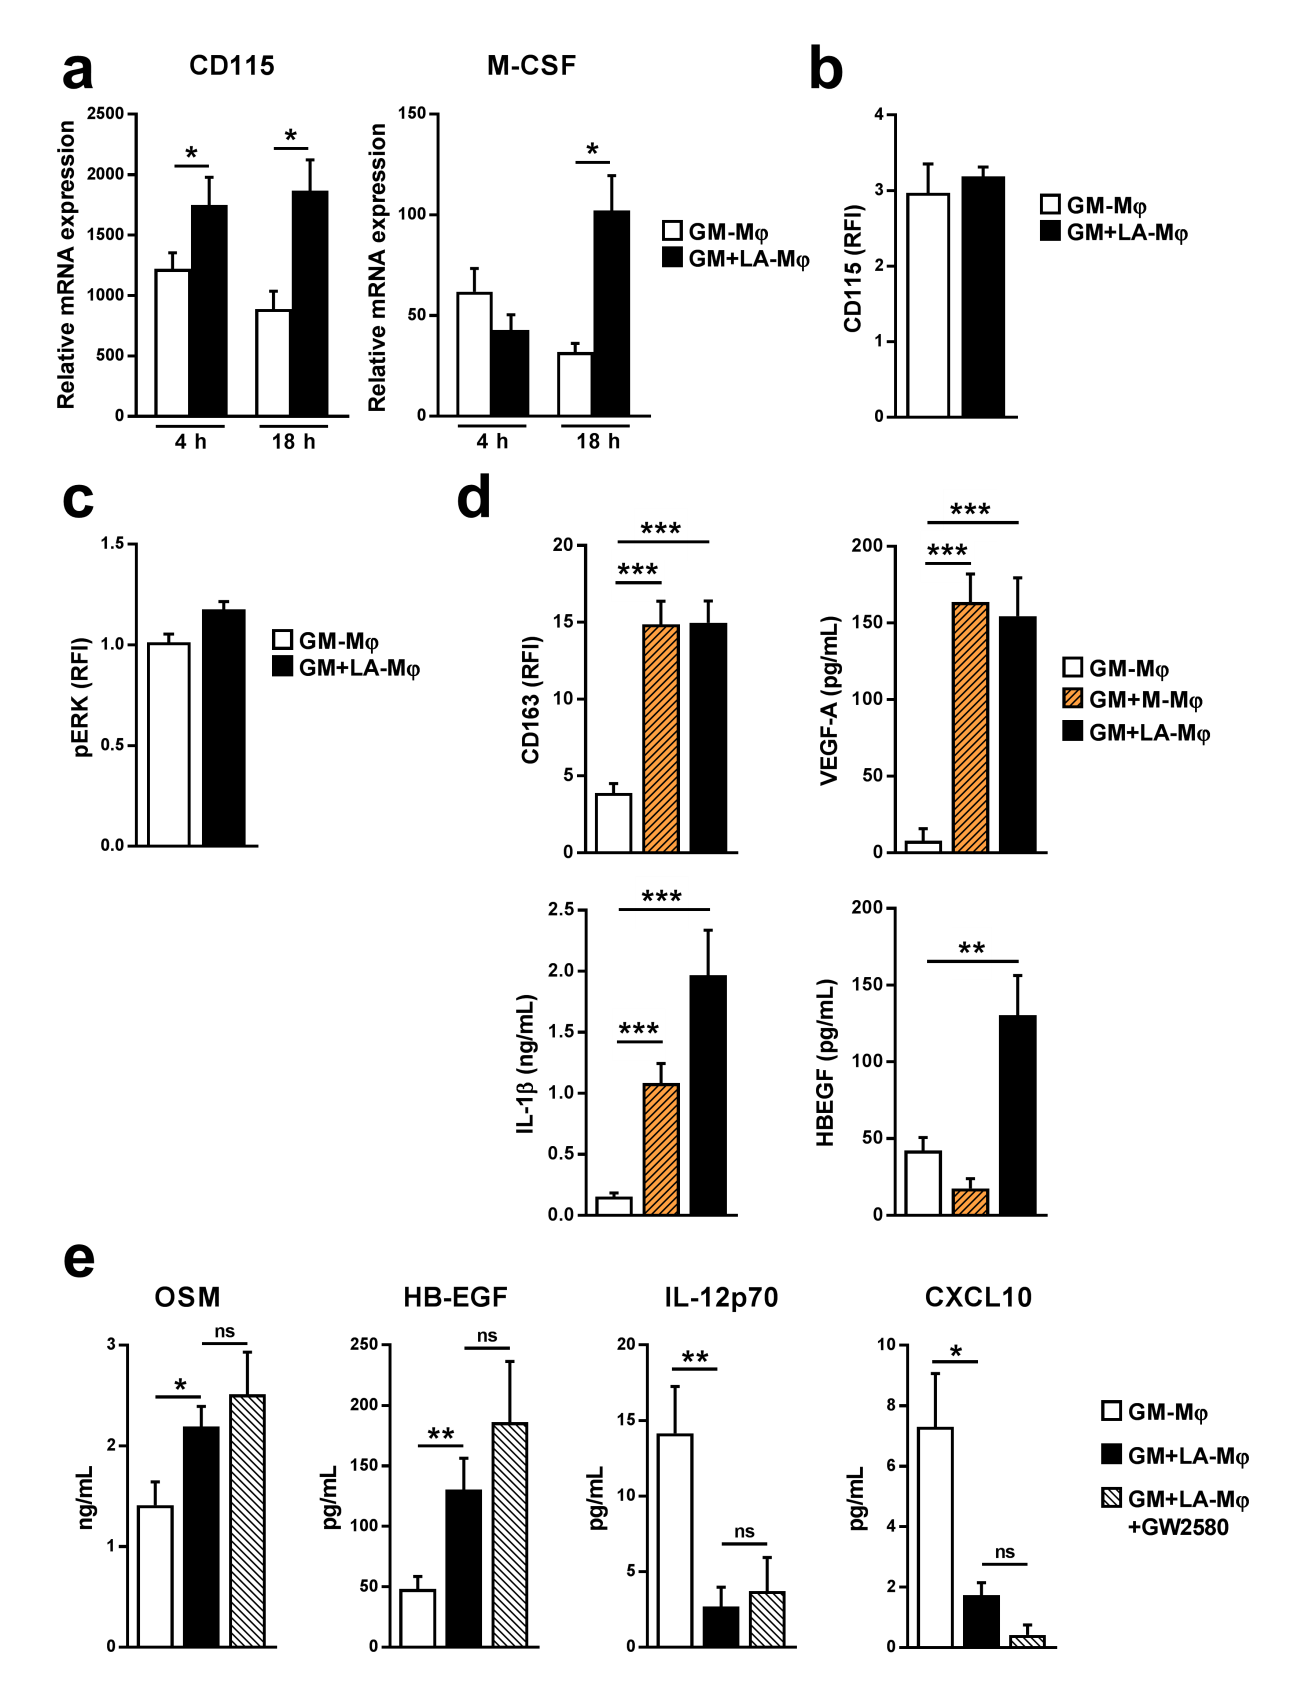


**Supplementary Figure S4.** **a**. Monocytes were cultured with 50 ng/mL GM-CSF (GM-Mφ) or 50 ng/mL GM-CSF plus 10 mM lactic acid (GM+LA-Mφ). **a.** The relative expression of the mRNA encoding CD115 and M-CSF was assessed by qPCR at indicated time points. Specific gene expression was calculated using the 2-ΔΔCT method using housekeeping genes as calibrator; results are expressed as relative mRNA expression (n=3). **b**. The expression of CD115 (membrane and intracellular) was assessed by flow cytometry at 24 h (n=3) **c.** Cells were collected at day 2 and stimulated 20 min with 200 ng/mL LPS before analyzing the expression of pERK1/2 by flow cytometry (using PE-labeled anti-ERK1/2 phospho Thr202/Tyr204, clone 6B8B69, Biolegend). **d**.Human monocytes were cultured for 5 days with 50 ng/mL GM-CSF or 50 ng/mL GM-CSF plus 10 ng/mL M-CSF plus 150 ng/mL IL-6 (from Immunotools, Friesoythe, Germany) added at day 2 GM-Mφ + M-CSF or GM-CSF plus LA (GM+LA-Mφ). The expression of CD163 was assessed by flow cytometry at day 5 (left panel). Day-5 cells were stimulated for 24 h with 200 ng/mL LPS and VEGF-A, IL-1β and HB-EGF were quantified in cell culture supernatants (n=4). **e.** Monocytes were cultured for 5 days with 50 ng/mL GM-CSF (GM-Mφ) or 50 n/mL GM-CSF plus 10 mM lactic acid in the absence (GM+LA-Mφ) or presence of 3 µM GW2580 (GM+LA-Mφ + GW2580). At day 5, cells were stimulated for 24 h with 200 ng/mL LPS before quantification of OSM, HB-EGF, IL-12p70 and CXCL10 by ELISA. Results are expressed in pg/mL or ng/mL (n=5). **a**-**e**. mean ± SEM; * p<0.05; ** p<0.01; *** p<0.001 (Wilcoxon test).
